# Supplementary material for: Water-soluble gold nanoparticles stabilized with cationic phosphonium thiolate ligands
Source: Royal Society of Chemistry journal article supplement (doi:10.1039/c2ra21421k), 2012-01-01
Supplement: c2ra21421k.pdf [file c2ra21421k.pdf]

# Water-Soluble Gold Nanoparticles Stabilized with Cationic Phosphonium Thiolate Ligands

Yon Ju-Nam,<sup>a</sup> Yu-Su Chen,<sup>b</sup> Jesus J. Ojeda,<sup>c</sup> David W. Allen,<sup>b</sup> Neil A. Cross,<sup>b</sup> Philip H. E. Gardiner,<sup>b</sup> and Neil Bricklebank<sup>b\*</sup>

<sup>a</sup>. *Multidisciplinary Nanotechnology Centre, College of Engineering, Swansea University, Singleton Park, Swansea, SA2 8PP, UK*

<sup>b</sup>. *Biomedical Research Centre, Sheffield Hallam University, City Campus, Sheffield S1 1WB, UK*

<sup>c</sup>. *Experimental Techniques Centre, Brunel University, Kingston Lane, Uxbridge, Middlesex, UB8 3PH, UK*

\*Corresponding author E-mail: [n.bricklebank@shu.ac.uk](mailto:n.bricklebank@shu.ac.uk)

## Supplementary Figures

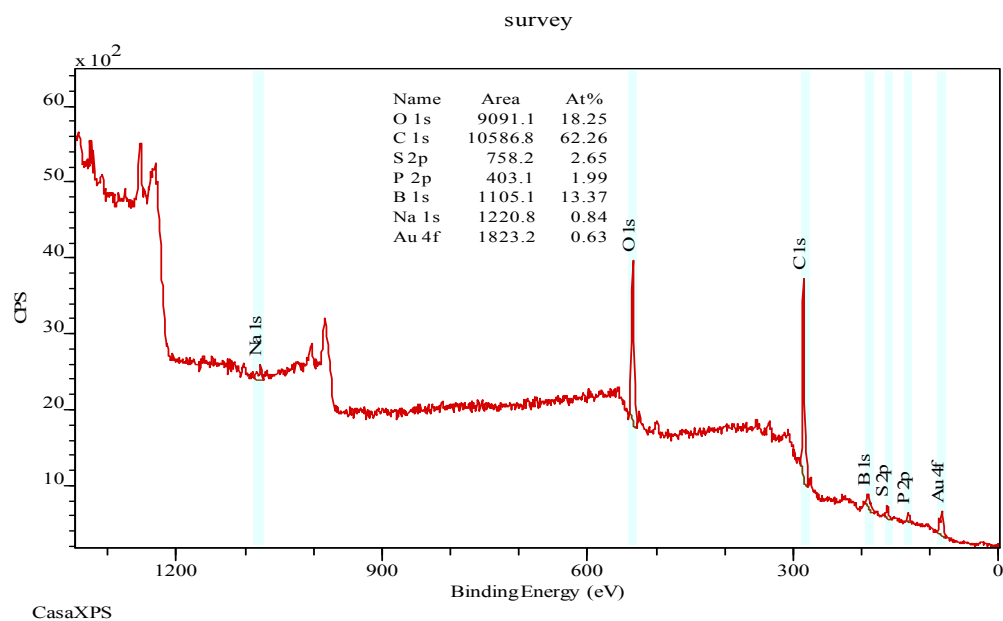

(a)

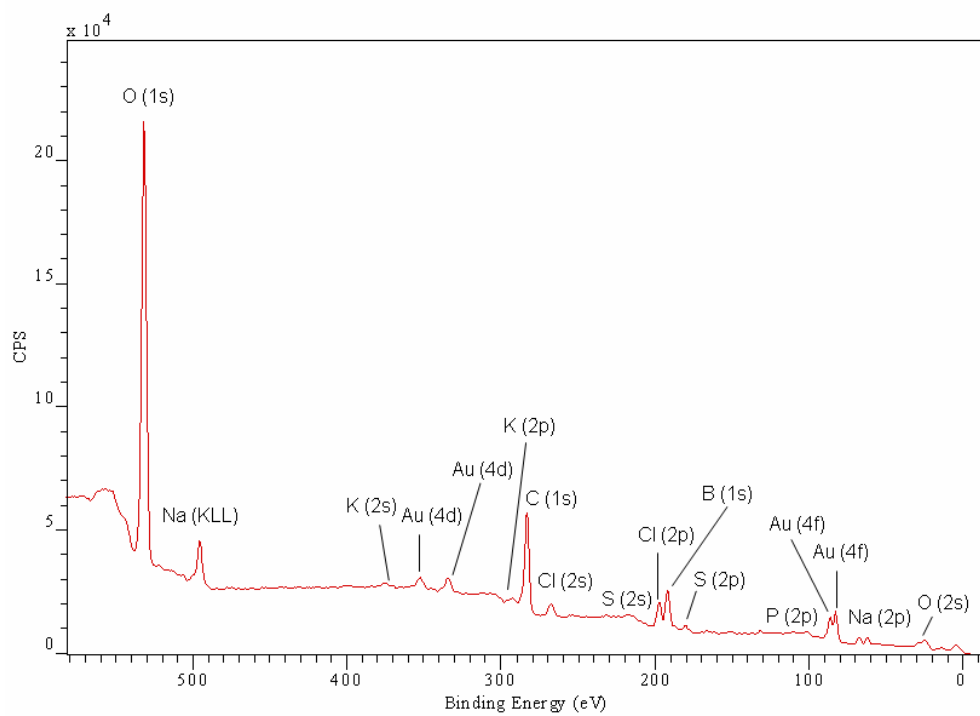

(b)

**Fig S1.** Widescan XPS spectra of freeze-dried phosphonium-AuNPs; (a) obtained from PPTS ligand; (b) Nanoparticles obtained from PPTA ligand.

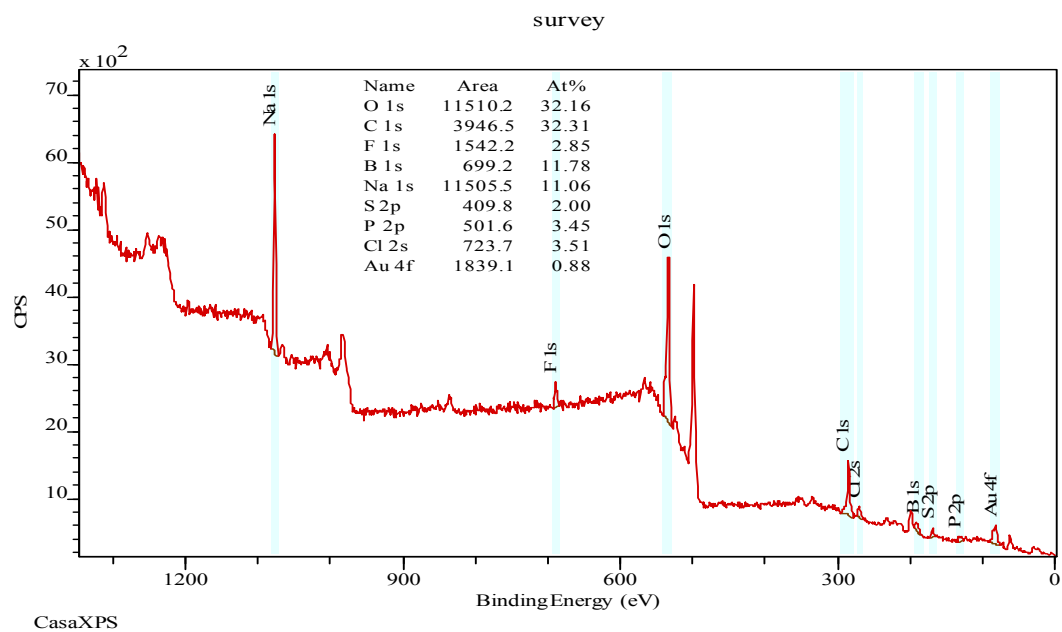

(c)

**Fig S1.** (c) Widescan XPS spectrum of freeze-dried phosphonium-AuNPs obtained from FPPTS ligand.

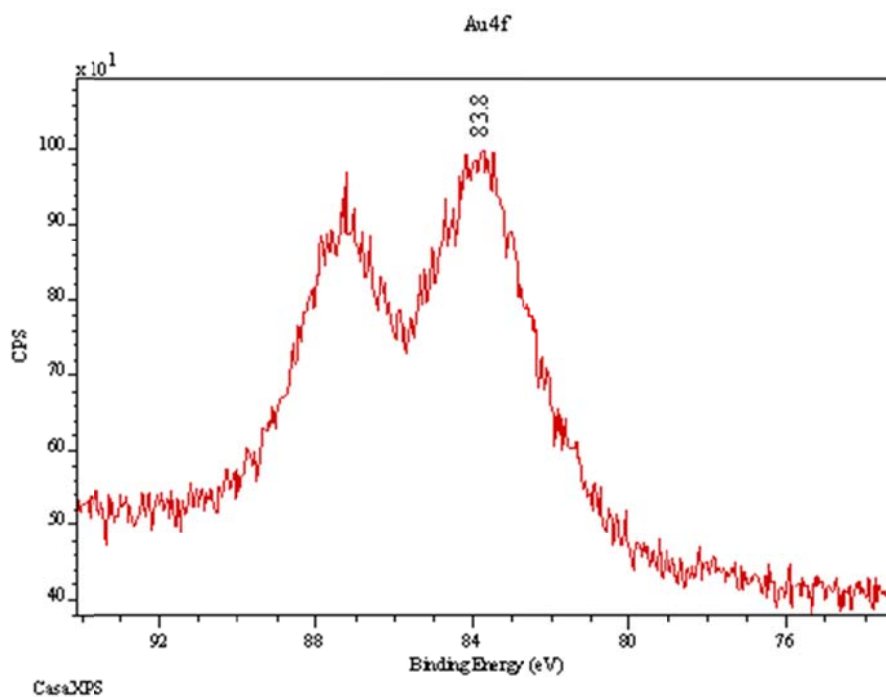

(a)  
Au4f

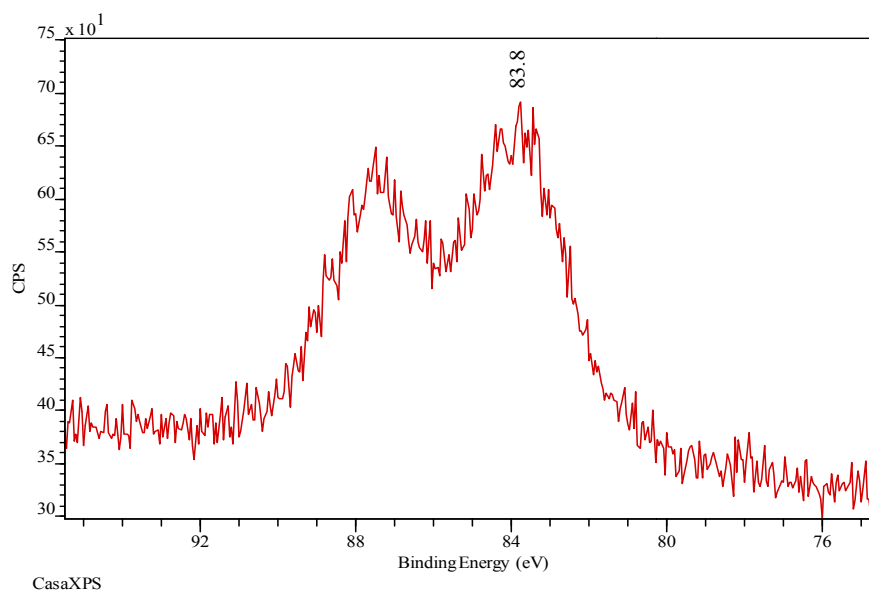

(b)

**Fig S2.** High resolution Au(4f) XPS spectra of freeze-dried phosphonium-AuNPs. (a) Nanoparticles obtained from PPTA ligand; (b) Nanoparticles obtained from FPPTS ligand.

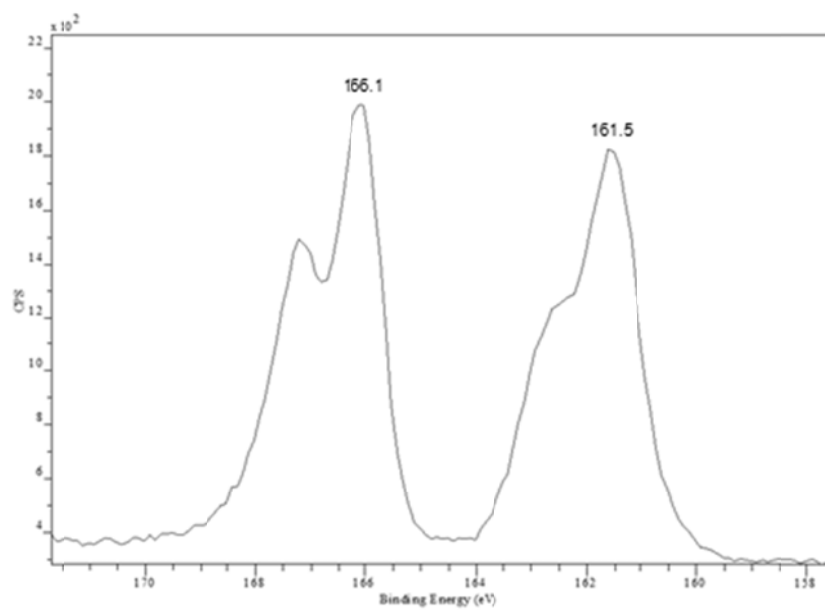

**Fig S3.** High resolution S<sub>2p</sub> XPS spectrum of the PPTS ligand.

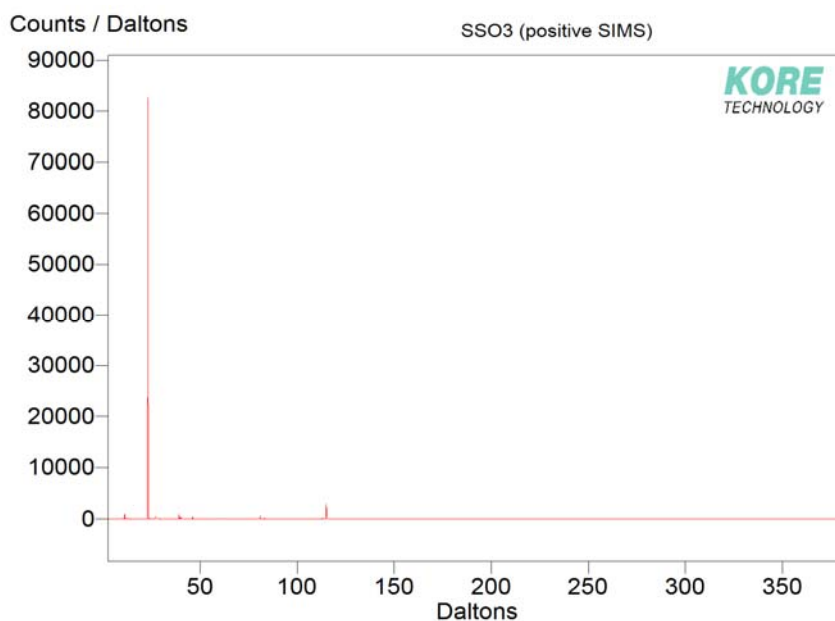

(a)

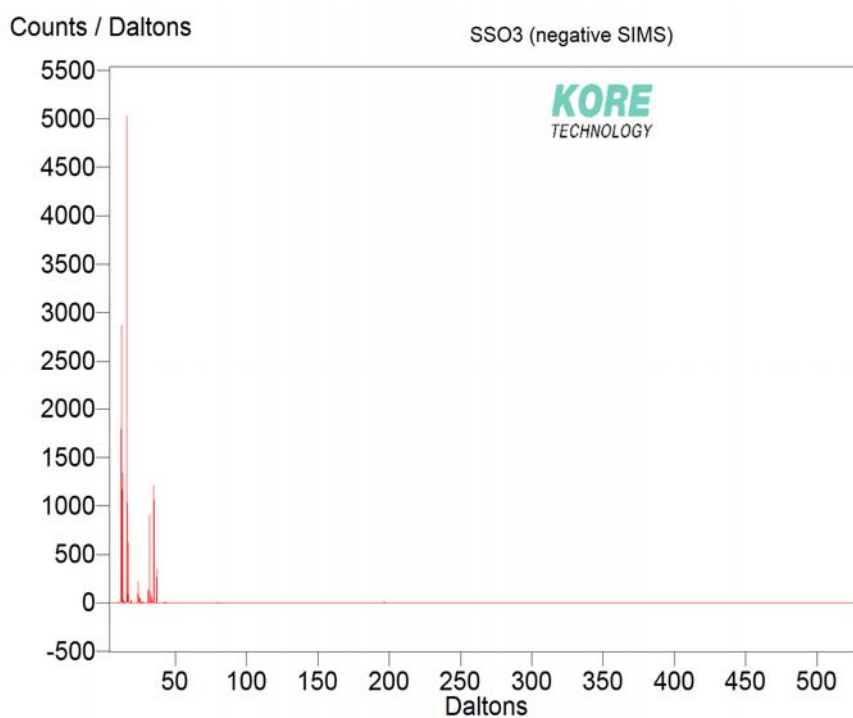

(b)

**Fig S4.** SIMS spectrum of phosphonium-AuNPs derived from PPTS ligands: (a) positive ion mode; (b) negative ion mode.

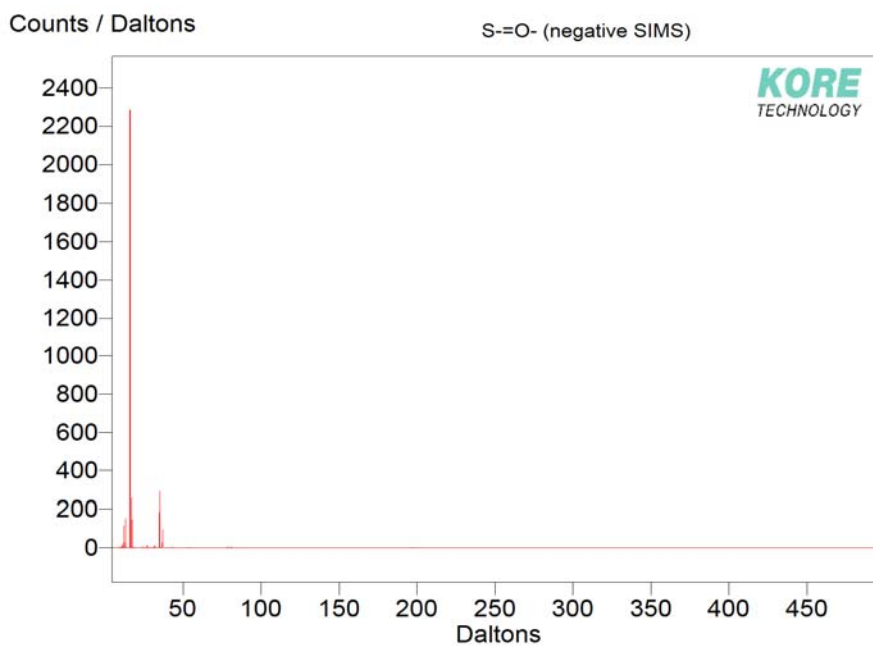

(a)

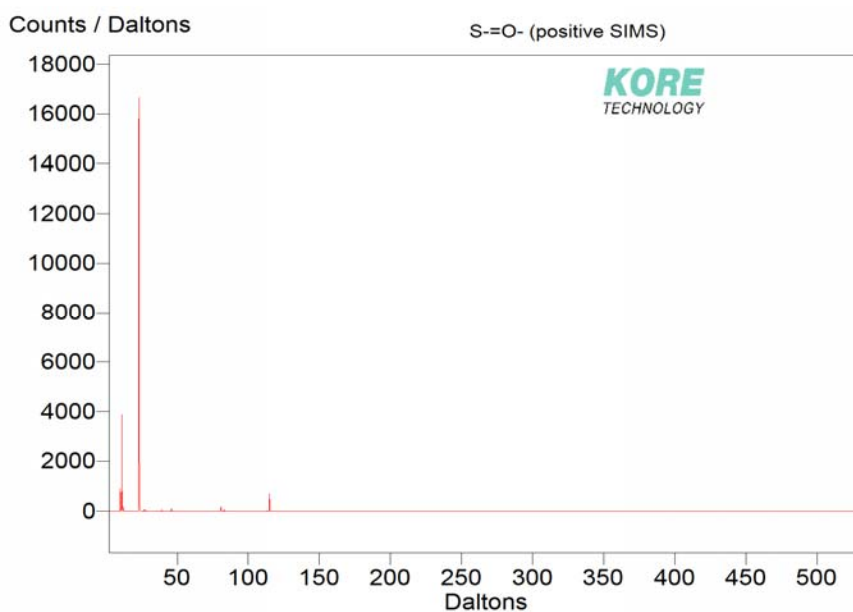

(b)

**Fig S5.** SIMS spectrum of phosphonium-AuNPs derived from PPTA ligands: (a) positive ion mode; (b) negative ion mode.

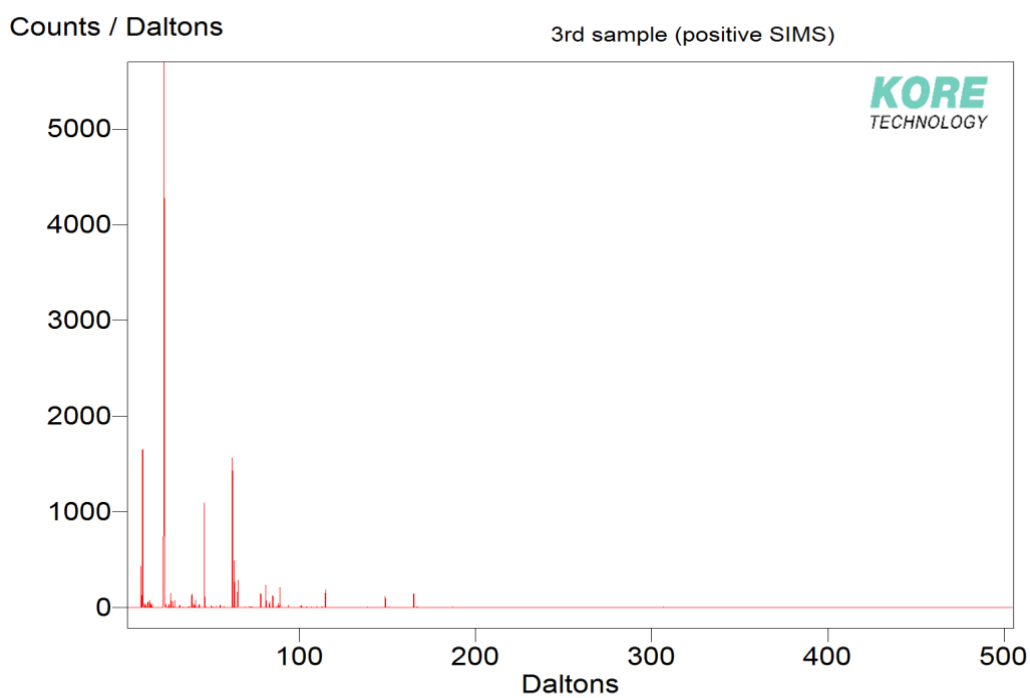

(b)

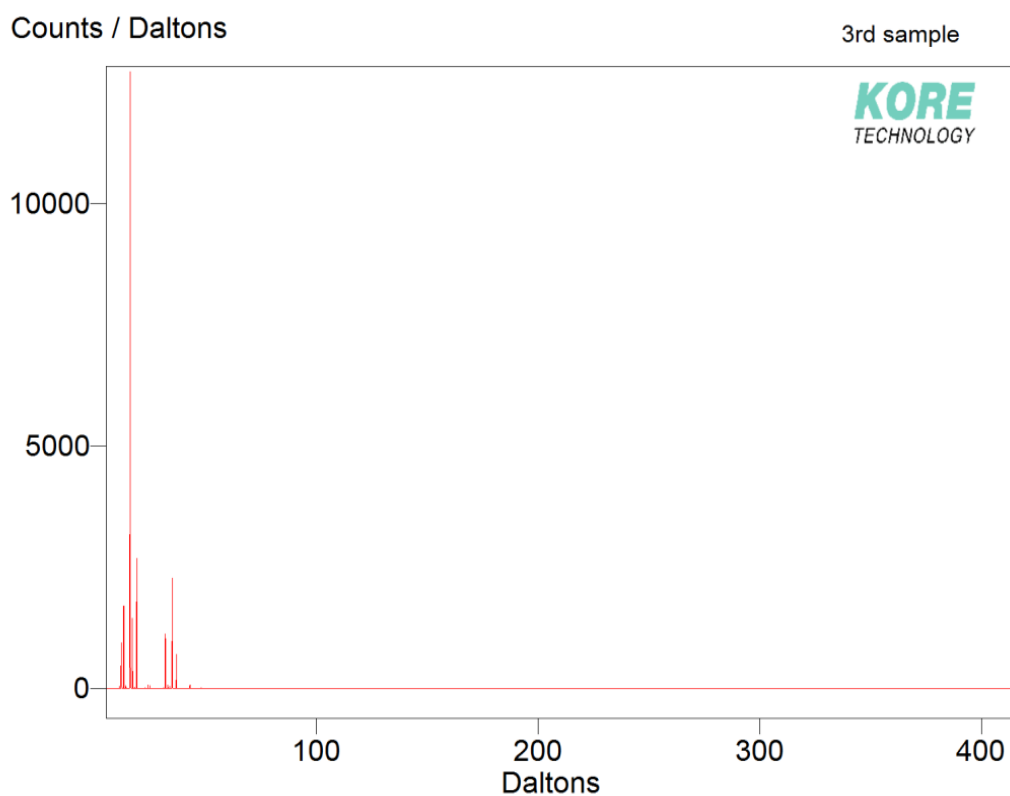

(a)

**Fig S6.** SIMS spectrum of phosphonium-AuNPs derived from FPPTS ligands: (a) positive ion mode; (b) negative ion mode.



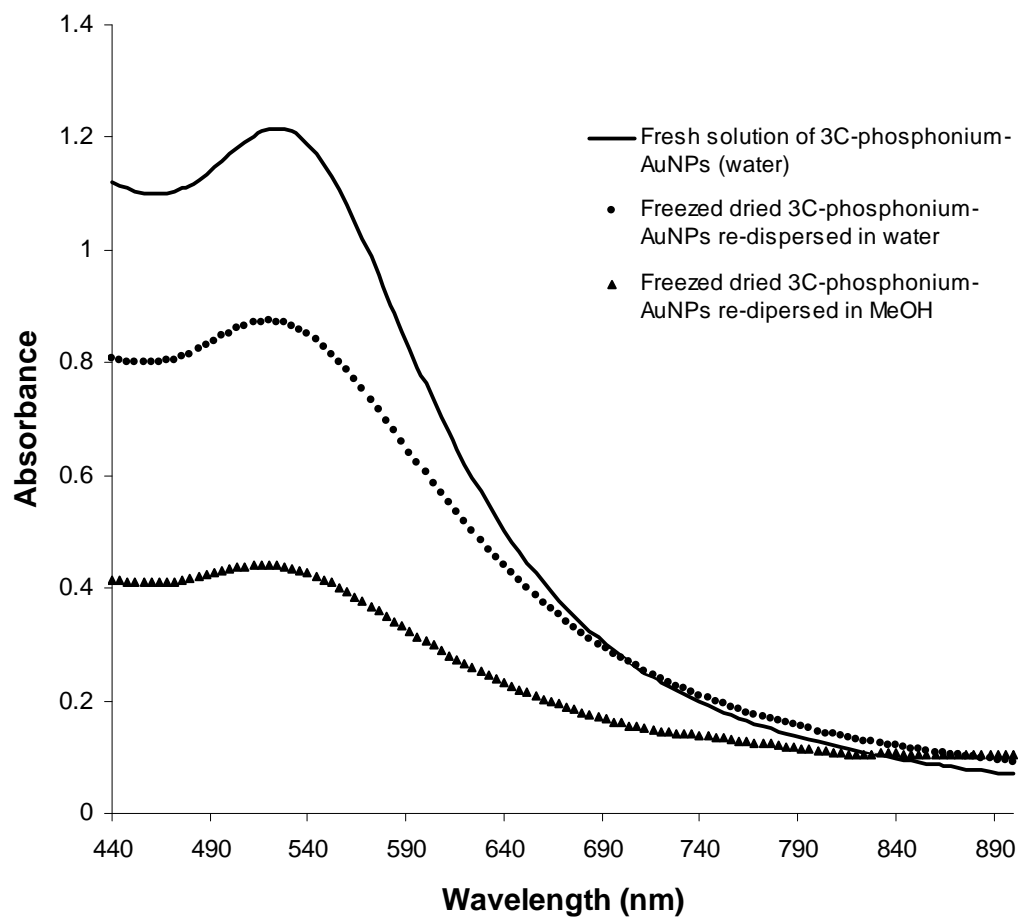

**Fig.S7** UV-visible spectra of a fresh solution of phosphonium-AuNPs prepared using PPTS ligand ( $\square$ ) and the freeze-dried nanoparticles re-suspended in water ( $\bullet$ ) and methanol ( $\blacktriangle$ ).
